# Supplementary material for: Targeting virulence regulation to disarm Acinetobacter baumannii pathogenesis
Source: PubMed Central journal article supplement (PMC9586577; doi:10.1080/21505594.2022.2135273), 2022-10-19
Supplement: KVIR_A_2135273_SM7587.pdf [file KVIR_A_2135273_SM7587.pdf]

## Supplementary data

### Targeting virulence regulation to disarm *Acinetobacter baumannii* pathogenesis

Vincent Trebosc<sup>1,a</sup>, Valentina Lucchini<sup>1,a,b</sup>, Mohit Narwal<sup>1,c</sup>, Basil Wicki<sup>a</sup>, Sarah Gartenmann<sup>a</sup>, Birgit Schellhorn<sup>a</sup>, Julian Schill<sup>a</sup>, Marilynne Bourotte<sup>c</sup>, Daniel Frey<sup>d</sup>, Jürgen Grünberg<sup>e</sup>, Andrej Trauner<sup>a</sup>, Livia Ferrari<sup>f</sup>, Antonio Felici<sup>f</sup>, Olivia L. Champion<sup>g</sup>, Marc Gitzinger<sup>a</sup>, Sergio Lociuoro<sup>a</sup>, Richard A. Kammerer<sup>c</sup>, Christian Kemmer<sup>a</sup>, Michel Pieren<sup>\*a</sup>

<sup>a</sup> BioVersys AG, Basel, Switzerland

<sup>b</sup> Biozentrum, University of Basel, Basel, Switzerland

<sup>c</sup> BioVersys SAS, Lille, France

<sup>d</sup> Laboratory of Biomolecular Research, Division of Biology and Chemistry, Paul Scherrer Institute, Villigen, Switzerland

<sup>e</sup> Center for Radiopharmaceutical Sciences ETH-PSI-USZ, Paul Scherrer Institute, Villigen, Switzerland

<sup>f</sup> Aptuit Srl, an Evotec Company, Verona, Italy

<sup>g</sup> Biosystems Technology Ltd, Exeter, UK

<sup>1</sup> Contributed equally

\* Corresponding author: Michel Pieren, [michel.pieren@bioversys.com](mailto:michel.pieren@bioversys.com)

## Supplementary Figures

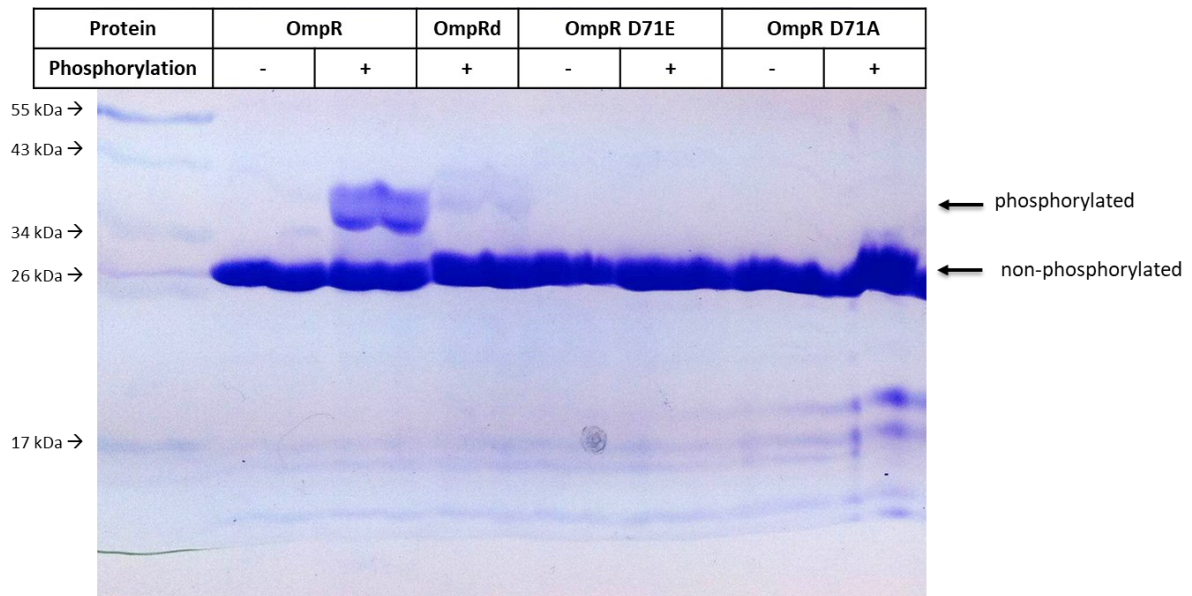

**Figure S1: Phosphorylation of OmpR variants.**

The OmpR variants from *A. baumannii* were phosphorylated *in vitro* and the phosphorylation was analyzed using Phos-tag SDS gel. Protein retention is significant of protein phosphorylation. Denatured OmpR (OmpRd, 5 min at 95°C) was used as control.

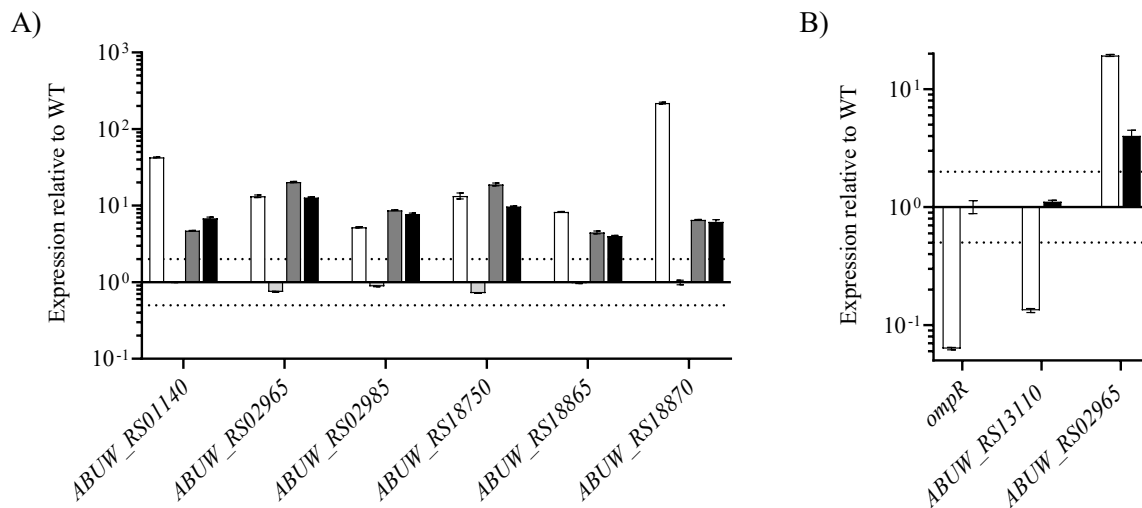

**Figure S2: Confirmation of OmpR regulated genes using qRT-PCR on the chromosomal mutants and the complemented strain.**

A) The transcript levels of OmpR upregulated genes encoding small hypothetical protein were determined in *A. baumannii* AB5075 wildtype, AB5075  $\Delta ompR$  (white), AB5075 OmpR D71E (light grey), AB5075 OmpR D71A (dark grey) and AB5075 OmpR R198L (black) mutants by quantitative real-time PCR and the expression level was normalized to the expression of the AB5075 wildtype strain (means  $\pm$  SEM of 2 technical replicates). B) The transcript levels of *ompR*, ABUW\_RS13110 and ABUW\_RS02965 were determined in *A. baumannii* AB5075 wildtype, AB5075  $\Delta ompR$  (white) and AB5075 OmpR complemented (black) strains by quantitative real-time PCR and the expression level was normalized to the expression of the AB5075 wildtype strain (means  $\pm$  SEM of 2 technical replicates). Horizontal dotted lines depict a 2-fold up- or downregulation.

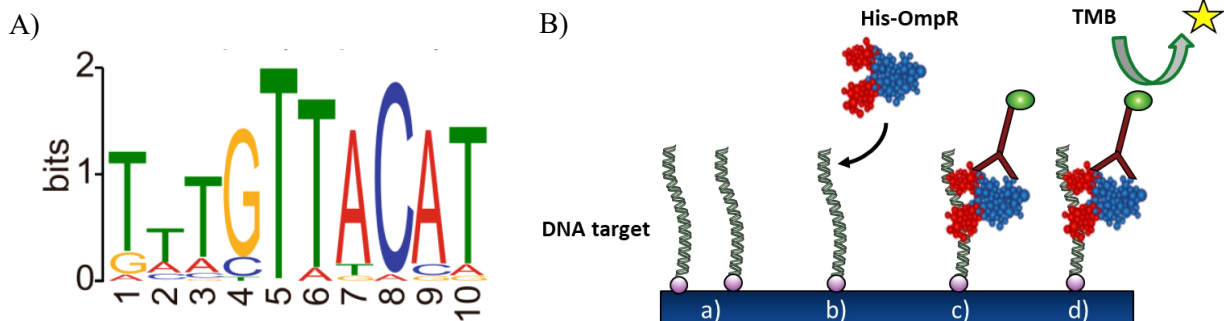

**Figure S3: OmpR DNA binding motif and method to study OmpR-DNA binding *in vitro*.**

(A) *E. coli* OmpR DNA binding Weblogo determined by Seo et al [18] (B) DNA binding enzyme-linked immunosorbent (D-ELISA) sandwich method to quantify OmpR-DNA binding: a) coating of D-ELISA plate with streptavidin followed by immobilization of biotinylated oligonucleotides, b) OmpR His-tag protein binding to immobilized oligonucleotides, c) anti-His-HRP antibody binding to bound OmpR and d) HRP-based enzymatic quantification of bound OmpR.

**ABUW\_RS02965** AGCAATTGACCTAGCTTGAAAAATGCTAA**TGGTAGCACAG**GATACAGATTCTTCATATTTTCTTTATAGTCATTACAAACAATATCAATCAAAGCCATTTTATTCATGGTTTCTCCTTGACTCTCTTAATCTAGCTTCAGATCAAGATAAAAAGGAATACTCCATG  
**ABUW\_RS02965\_A** TTGAAAAATGCTAA**TGGTAGCACAG**GATACAGATTCTTCATATTTT  
**ABUW\_RS02965\_B** TTTTCTTTATAGTCATTACAAACAATATCAATCAAAGCCATTTT  
**ABUW\_RS02965\_C** TTTTATTCATGGTTTCTCCTTGACTCTCTTAATCTAGCTTCAGATCAAGAT

**ABUW\_RS07785** TAGGTCGATTTAGTACAAAAAAGGAGCTGATTATTAGCTCCTTTTATTCTAATGAGAA**TGGTACATA**ATTTAATTGTTAAAAATAAAATTAATCATGTTTATTCTAATAAAATGAAAAATAAATAACGCTAGATATTAAGAAGATTTGTTTTAAAA  
 TATTTGTATGAACCTAAAAATAATTAAGAACAATGGGTATTTTATATGGAATTTAAAAATG

**ABUW\_RS02985** AAGCACTCTCATTTTTACTCTATATTTTGC**ATTGTAACCA**ACAACGAAAAGAAAACTCTCCATTGTTTCTTCATCTTTATTATCTAATCTTTAAGTCATCTTAAACAAACATTAAGGGTTTTAACCAATG

**ABUW\_RS13110** ATAAATTAAGTCTATTTTAACTTAAATTTGGTTTTTTTAAAAATTTATGTGACGATTTTGCAAATTTAAAAATGAATAATTTAT**AGTGAAGCTT**GAGTTCATTTTTATTAATGATTTGATTTTAAAAATAAAAAATTTGTAATATTTCTTGTACAACGATTTT  
 GTCGACAATACAGGATTGTTTTGACATATTTGCCTAGCGTAATCAATAGAGTTTTTTGCCTAATG

**Figure S4: Sequence of the intergenic region upstream of the OmpR-regulated genes.**

The intergenic region upstream of *ABUW\_RS02965* has been divided in three to design the oligo *ABUW\_RS02965\_A*, *ABUW\_RS02965\_B* and *ABUW\_RS02965\_C* for D-ELISA assay with OmpR<sub>ABA</sub> (Figure 4E). The start codon is underlined and the OmpR DNA binding sequence motifs identified with the MEME suite are highlighted in red (Figure 4D). The motifs for *ABUW\_RS02985* and *ABUW\_RS13110* were identified on the minus strand.

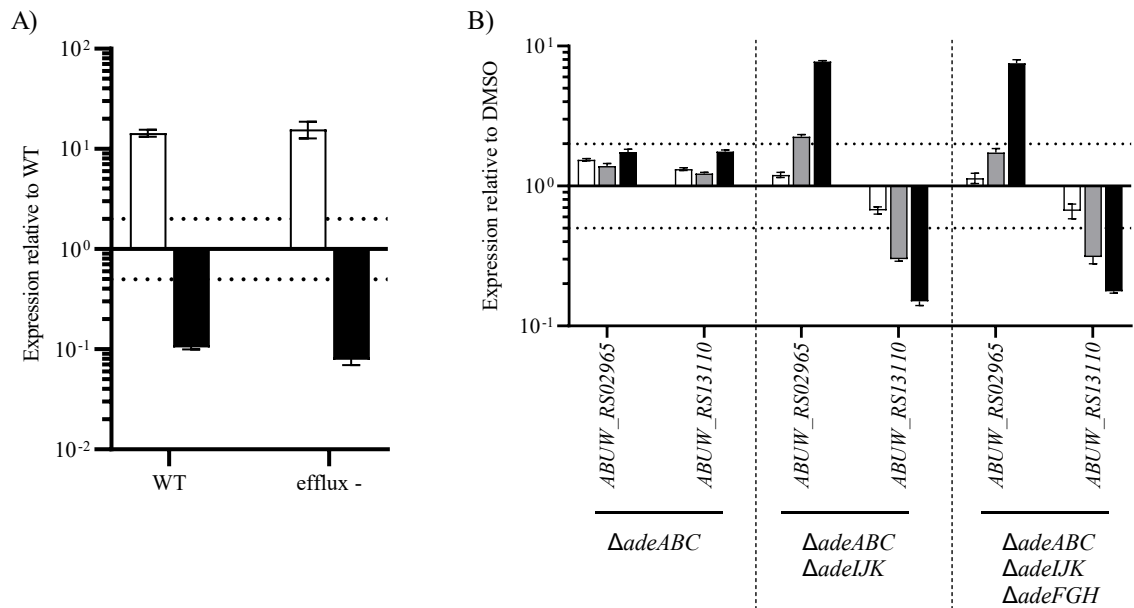

**Figure S5: OmpR-regulated genes in the AYE efflux depleted mutant using qRT-PCR.**

A) The transcript levels of *ABUW\_RS02965* (white) and *ABUW\_RS13110* (black) were determined in the  $\Delta ompR$  mutants of the *A. baumannii* AYE wildtype and efflux depleted ( $\Delta adeABC \Delta adeFGH \Delta adeIJK$ ) mutant and normalized to the transcript levels of their respective wildtype strains (mean  $\pm$  SEM of 2 technical replicates). B) The transcript levels of *ABUW\_RS02965* and *ABUW\_RS13110* were determined in the single ( $\Delta adeABC$ ), double ( $\Delta adeABC \Delta adeIJK$ ) and triple ( $\Delta adeABC \Delta adeFGH \Delta adeIJK$ ) efflux deletion mutant of *A. baumannii* AYE in the presence of VSIS\_039 at 20  $\mu$ M (white), 40  $\mu$ M (grey) and 80  $\mu$ M (black). The transcripts levels were normalized to those of the DMSO control (mean  $\pm$  SEM of 2 technical replicates). Horizontal dotted lines depict a 2-fold up- or downregulation.

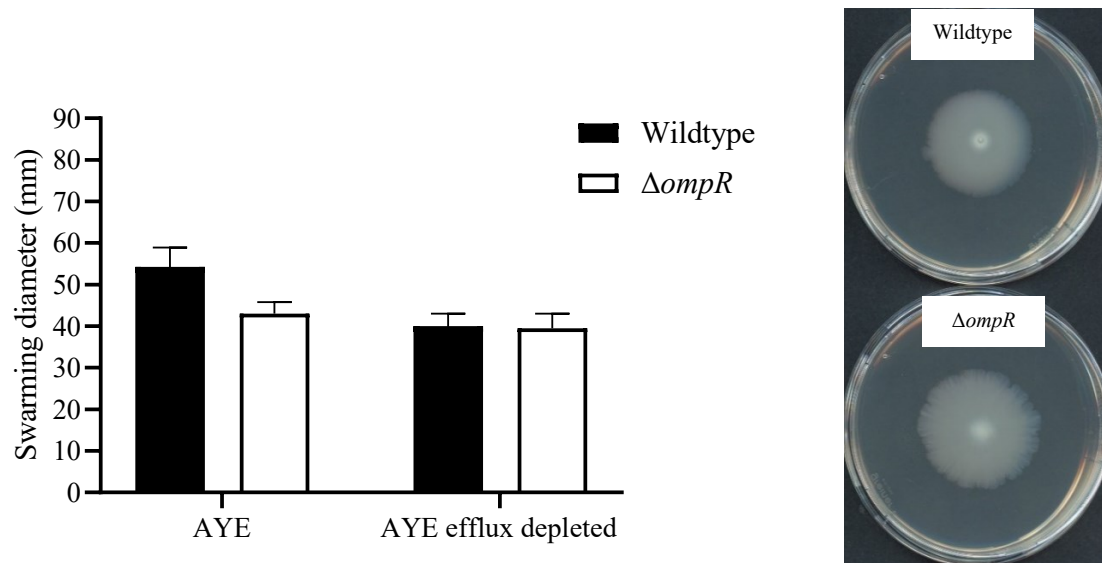

**Figure S6: Swarming motility of *A. baumannii* AYE wildtype and *ompR* deleted ( $\Delta ompR$ ) strains.** Swarming motility was evaluated for the wildtype /  $\Delta ompR$  pair of strains of AYE and AYE efflux depleted strain ( $\Delta adeABC\Delta adeIJK\Delta adeFGH$ ). The graph reports the swarming diameter while the picture illustrates the swarming of the *A. baumannii* efflux depleted AYE wildtype (up) and  $\Delta ompR$  (down) strains (mean  $\pm$  SEM of at least 2 replicates).

## Supplementary Tables

**Table S1: List of the 65 downregulated genes in  $\Delta ompR$  ( $<-2 \log_2$  fold change,  $\Delta ompR/WT$ ) and 71 upregulated genes in  $\Delta ompR$  ( $>2 \log_2$  fold change,  $\Delta ompR/WT$ ).**

| ID           | $\log_2$ FoldChange ( $\Delta ompR/WT$ ) | Product                                                      |
|--------------|------------------------------------------|--------------------------------------------------------------|
| ABUW_RS08030 | -5.152963056                             | TetR family transcriptional regulator                        |
| ABUW_RS11870 | -4.368892816                             | hypothetical protein                                         |
| ABUW_RS12725 | -4.305329643                             | hypothetical protein                                         |
| ABUW_RS07965 | -4.24527092                              | pilus assembly protein                                       |
| ABUW_RS07960 | -3.949138706                             | hypothetical protein                                         |
| ABUW_RS18635 | -3.79767744                              | UDP-N-acetyl-D-mannosamine dehydrogenase                     |
| ABUW_RS07145 | -3.705203924                             | hypothetical protein                                         |
| ABUW_RS07970 | -3.698264692                             | fimbrial protein                                             |
| ABUW_RS01495 | -3.552227695                             | prepilin-type cleavage/methylation domain-containing protein |
| ABUW_RS13690 | -3.354991113                             | TetR family transcriptional regulator                        |
| ABUW_RS03355 | -3.354416154                             | hybrid sensor histidine kinase/response regulator            |
| ABUW_RS11875 | -3.227852494                             | hypothetical protein                                         |
| ABUW_RS01430 | -3.199573033                             | membrane protein                                             |
| ABUW_RS09450 | -3.191789235                             | ribose-phosphate pyrophosphokinase                           |
| ABUW_RS13040 | -3.179126428                             | hypothetical protein                                         |
| ABUW_RS10420 | -3.144814662                             | hypothetical protein                                         |
| ABUW_RS15455 | -3.03176635                              | hypothetical protein                                         |
| ABUW_RS13110 | -3.01221703                              | transporter MatE                                             |
| ABUW_RS09455 | -2.98832666                              | nicotinate phosphoribosyltransferase                         |
| ABUW_RS07975 | -2.905653226                             | hypothetical protein                                         |
| ABUW_RS07785 | -2.888583284                             | hypothetical protein                                         |
| ABUW_RS13815 | -2.887412345                             | hypothetical protein                                         |
| ABUW_RS18630 | -2.835136126                             | polysaccharide biosynthesis protein                          |
| ABUW_RS07255 | -2.828869248                             | protein CsuA                                                 |
| ABUW_RS03350 | -2.808936997                             | chemotaxis protein                                           |
| ABUW_RS01440 | -2.792972915                             | hypothetical protein                                         |
| ABUW_RS06270 | -2.743514067                             | hypothetical protein                                         |
| ABUW_RS11790 | -2.725242202                             | amino acid ABC transporter permease                          |
| ABUW_RS01290 | -2.703419778                             | hypothetical protein                                         |
| ABUW_RS03345 | -2.667668241                             | twitching motility protein PilT                              |
| ABUW_RS07800 | -2.661221571                             | membrane protein                                             |
| ABUW_RS01435 | -2.650341865                             | hypothetical protein                                         |
| ABUW_RS14740 | -2.573108743                             | hemerythrin                                                  |
| ABUW_RS03335 | -2.45451199                              | response regulator                                           |
| ABUW_RS17270 | -2.451241573                             | type IV-A pilus assembly ATPase PilB                         |
| ABUW_RS17275 | -2.448651293                             | type II secretion system protein F                           |
| ABUW_RS00895 | -2.447969798                             | hypothetical protein                                         |
| ABUW_RS06590 | -2.431786046                             | type II secretion system protein E                           |
| ABUW_RS09960 | -2.390032425                             | hypothetical protein                                         |
| ABUW_RS07250 | -2.386735092                             | protein CsuA/B                                               |



|              |              |                                                       |
|--------------|--------------|-------------------------------------------------------|
| ABUW_RS08615 | -2.384859643 | hypothetical protein                                  |
| ABUW_RS03360 | -2.348787548 | hypothetical protein                                  |
| ABUW_RS00795 | -2.347192551 | MBL fold metallo-hydrolase                            |
| ABUW_RS16790 | -2.287666781 | hypothetical protein                                  |
| ABUW_RS01465 | -2.282931643 | glutamate synthase large subunit                      |
| ABUW_RS02875 | -2.272260195 | two-component sensor histidine kinase                 |
| ABUW_RS01550 | -2.26632454  | pilus assembly protein PilW                           |
| ABUW_RS14710 | -2.262323809 | twitching motility protein PilT                       |
| ABUW_RS01425 | -2.231965395 | pilus assembly protein PilM                           |
| ABUW_RS03365 | -2.21954724  | coproporphyrinogen III oxidase                        |
| ABUW_RS14715 | -2.211650472 | twitching motility protein PilT                       |
| ABUW_RS05525 | -2.208639151 | hypothetical protein                                  |
| ABUW_RS11235 | -2.195499967 | ferrous iron transporter B                            |
| ABUW_RS13105 | -2.191786023 | hypothetical protein                                  |
| ABUW_RS09530 | -2.181595516 | TetR family transcriptional regulator                 |
| ABUW_RS01555 | -2.167614921 | hypothetical protein                                  |
| ABUW_RS18625 | -2.16215534  | hypothetical protein                                  |
| ABUW_RS18640 | -2.161371559 | UDP-N-acetylglucosamine 2-epimerase (non-hydrolyzing) |
| ABUW_RS17370 | -2.157315431 | peptidoglycan hydrolase                               |
| ABUW_RS13035 | -2.115209735 | hypothetical protein                                  |
| ABUW_RS11850 | -2.095210977 | NAD(P)-dependent oxidoreductase                       |
| ABUW_RS01445 | -2.069233992 | membrane protein                                      |
| ABUW_RS07980 | -2.041806136 | glutathione S-transferase                             |
| ABUW_RS11425 | -2.008071889 | tautomerase                                           |
| ABUW_RS01275 | -2.00763149  | fatty acyl-CoA reductase                              |
| ABUW_RS15165 | 2.002104113  | trehalose-6-phosphate synthase                        |
| ABUW_RS04980 | 2.005017416  | hypothetical protein                                  |
| ABUW_RS11915 | 2.006015486  | SAM-dependent methyltransferase                       |
| ABUW_RS07905 | 2.02022884   | ethanolamine permease                                 |
| ABUW_RS08920 | 2.044784618  | 3-oxoadipyl-CoA thiolase                              |
| ABUW_RS11925 | 2.052534622  | TetR family transcriptional regulator                 |
| ABUW_RS14335 | 2.07063006   | (2Fe-2S)-binding protein                              |
| ABUW_RS12645 | 2.07683365   | acetyl/propionyl-CoA carboxylase subunit alpha        |
| ABUW_RS09050 | 2.110067963  | hypothetical protein                                  |
| ABUW_RS07625 | 2.111922975  | luciferase family oxidoreductase                      |
| ABUW_RS03655 | 2.114704215  | hypothetical protein                                  |
| ABUW_RS03690 | 2.115251333  | DNA replication protein DnaD                          |
| ABUW_RS11950 | 2.143126695  | hydroxymethylglutaryl-CoA lyase                       |
| ABUW_RS09360 | 2.149858781  | hydrolase                                             |
| ABUW_RS03205 | 2.152831275  | RNA-splicing ligase RtcB                              |
| ABUW_RS05450 | 2.154458373  | aromatic amino acid transporter AroP                  |
| ABUW_RS13610 | 2.180757921  | gamma-aminobutyraldehyde dehydrogenase                |
| ABUW_RS09260 | 2.197897889  | sorbosone dehydrogenase                               |
| ABUW_RS09060 | 2.204598518  | (2Fe-2S)-binding protein                              |
| ABUW_RS08205 | 2.215393814  | lactonase                                             |
| ABUW_RS11920 | 2.231187048  | fatty acid--CoA ligase                                |
| ABUW_RS02945 | 2.251007273  | hypothetical protein                                  |

|              |             |                                                                  |
|--------------|-------------|------------------------------------------------------------------|
| ABUW_RS11940 | 2.253834891 | enoyl-CoA hydratase                                              |
| ABUW_RS15140 | 2.27409912  | malonyl-[acyl-carrier protein] O-methyltransferase BioC          |
| ABUW_RS09065 | 2.275172651 | aromatic-ring-hydroxylating dioxygenase subunit beta             |
| ABUW_RS11945 | 2.275395335 | 3-methylcrotonyl-CoA carboxylase subunit alpha                   |
| ABUW_RS08915 | 2.310124094 | 3-oxoadipate CoA-transferase subunit B                           |
| ABUW_RS12665 | 2.319789099 | hypothetical protein                                             |
| ABUW_RS12650 | 2.406656548 | allophanate hydrolase                                            |
| ABUW_RS11935 | 2.416654319 | methylcrotonoyl-CoA carboxylase                                  |
| ABUW_RS15145 | 2.425254961 | 8-amino-7-oxononanoate synthase                                  |
| ABUW_RS17915 | 2.42534756  | ATPase                                                           |
| ABUW_RS12660 | 2.454310317 | hypothetical protein                                             |
| ABUW_RS14330 | 2.470163045 | hypothetical protein                                             |
| ABUW_RS03685 | 2.504196589 | hypothetical protein                                             |
| ABUW_RS15150 | 2.525208161 | adenosylmethionine--8-amino-7-oxononanoate aminotransferase BioA |
| ABUW_RS11930 | 2.528314598 | isovaleryl-CoA dehydrogenase                                     |
| ABUW_RS19690 | 2.549252604 | hypothetical protein                                             |
| ABUW_RS00325 | 2.5730652   | 4-hydroxyphenylpyruvate dioxygenase                              |
| ABUW_RS08910 | 2.575615162 | 3-oxoadipate CoA-transferase subunit A                           |
| ABUW_RS04555 | 2.616247733 | ABC transporter substrate-binding protein                        |
| ABUW_RS08055 | 2.625805749 | hypothetical protein                                             |
| ABUW_RS01745 | 2.628652304 | hypothetical protein                                             |
| ABUW_RS07295 | 2.675155384 | proline/betaine transporter                                      |
| ABUW_RS05445 | 2.689329246 | pyruvate decarboxylase                                           |
| ABUW_RS12655 | 2.695847506 | DUF1445 domain-containing protein                                |
| ABUW_RS11470 | 2.707164847 | glutamate symport protein                                        |
| ABUW_RS18865 | 2.739894706 | hypothetical protein                                             |
| ABUW_RS09045 | 2.743885166 | acyl-CoA dehydrogenase                                           |
| ABUW_RS07640 | 2.825507594 | hypothetical protein                                             |
| ABUW_RS13855 | 2.889418797 | amino-acid transporter Mb2008                                    |
| ABUW_RS09040 | 2.903434927 | Glu-tRNA amidotransferase                                        |
| ABUW_RS07910 | 2.972202959 | aldehyde dehydrogenase                                           |
| ABUW_RS10360 | 3.120148412 | lipoyl synthase                                                  |
| ABUW_RS10340 | 3.331455667 | dihydrolipoyl dehydrogenase                                      |
| ABUW_RS00825 | 3.394383298 | outer membrane protein                                           |
| ABUW_RS15475 | 3.503486865 | hypothetical protein                                             |
| ABUW_RS02985 | 3.673087414 | hypothetical protein                                             |
| ABUW_RS01270 | 3.746149042 | sulfate permease                                                 |
| ABUW_RS06025 | 3.783910616 | membrane protein                                                 |
| ABUW_RS07925 | 4.027868667 | alcohol dehydrogenase                                            |
| ABUW_RS07950 | 4.186229554 | hypothetical protein                                             |
| ABUW_RS18750 | 4.279546979 | hypothetical protein                                             |
| ABUW_RS10345 | 4.313013618 | diaminohydroxyphosphoribosylaminopyrimidine deaminase            |
| ABUW_RS07630 | 4.328430911 | hypothetical protein                                             |
| ABUW_RS01140 | 4.375161033 | hypothetical protein                                             |
| ABUW_RS10355 | 4.750588843 | ABC transporter substrate-binding protein                        |
| ABUW_RS10350 | 4.809402495 | pyruvate dehydrogenase subunit beta                              |

|                     |             |                      |
|---------------------|-------------|----------------------|
| <b>ABUW_RS02965</b> | 5.333078805 | hypothetical protein |
| <b>ABUW_RS14395</b> | 5.540563984 | hypothetical protein |
| <b>ABUW_RS18870</b> | 6.084762391 | hypothetical protein |

**Table S2: List of the 19 OmpR-activated candidate genes and 12 OmpR-repressed candidate genes potentially relevant for *A. baumannii* pathogenesis.**

| ID           | log2FoldChange ( $\Delta ompR/WT$ ) | Read Ratio ( <i>G. mellonella</i> /LB) <sup>1</sup> | Product                                                          |
|--------------|-------------------------------------|-----------------------------------------------------|------------------------------------------------------------------|
| ABUW_RS08030 | -5.152963056                        | 0.043739863                                         | TetR family transcriptional regulator                            |
| ABUW_RS11870 | -4.368892816                        | 0.058780238                                         | hypothetical protein                                             |
| ABUW_RS07965 | -4.24527092                         | 0.052994378                                         | pilus assembly protein                                           |
| ABUW_RS18635 | -3.79767744                         | 0.053481349                                         | UDP-N-acetyl-D-mannosamine dehydrogenase                         |
| ABUW_RS07145 | -3.705203924                        | 0.054538365                                         | hypothetical protein                                             |
| ABUW_RS07970 | -3.698264692                        | 0.139174375                                         | fimbrial protein                                                 |
| ABUW_RS11875 | -3.227852494                        | 0.195565828                                         | hypothetical protein                                             |
| ABUW_RS13040 | -3.179126428                        | 0.184394736                                         | hypothetical protein                                             |
| ABUW_RS13110 | -3.01221703                         | 0.141217409                                         | transporter MatE                                                 |
| ABUW_RS07975 | -2.905653226                        | 0.120654172                                         | hypothetical protein                                             |
| ABUW_RS07785 | -2.888583284                        | 0                                                   | hypothetical protein                                             |
| ABUW_RS09960 | -2.390032425                        | 0.132031752                                         | hypothetical protein                                             |
| ABUW_RS03365 | -2.21954724                         | 0.190465744                                         | coproporphyrinogen III oxidase                                   |
| ABUW_RS11235 | -2.195499967                        | 0.158606732                                         | ferrous iron transporter B                                       |
| ABUW_RS09530 | -2.181595516                        | 0.14107257                                          | TetR family transcriptional regulator                            |
| ABUW_RS18625 | -2.16215534                         | 0.08692852                                          | hypothetical protein                                             |
| ABUW_RS13035 | -2.115209735                        | 0.004379322                                         | hypothetical protein                                             |
| ABUW_RS11850 | -2.095210977                        | 0.121539888                                         | NAD(P)-dependent oxidoreductase                                  |
| ABUW_RS11425 | -2.008071889                        | 0.008644153                                         | tautomerase                                                      |
| ABUW_RS04980 | 2.005017416                         | 1.085639579                                         | hypothetical protein                                             |
| ABUW_RS11925 | 2.052534622                         | 0.934376763                                         | TetR family transcriptional regulator                            |
| ABUW_RS15140 | 2.27409912                          | 0.968768335                                         | malonyl-[acyl-carrier protein] O-methyltransferase BioC          |
| ABUW_RS15150 | 2.525208161                         | 1.53242563                                          | adenosylmethionine--8-amino-7-oxononanoate aminotransferase BioA |
| ABUW_RS00325 | 2.5730652                           | 1.125844462                                         | 4-hydroxyphenylpyruvate dioxygenase                              |
| ABUW_RS01745 | 2.628652304                         | 1.162884654                                         | hypothetical protein                                             |
| ABUW_RS18865 | 2.739894706                         | 2.040619566                                         | hypothetical protein                                             |
| ABUW_RS02985 | 3.673087414                         | 1.582951167                                         | hypothetical protein                                             |
| ABUW_RS18750 | 4.279546979                         | 1.001278226                                         | hypothetical protein                                             |
| ABUW_RS01140 | 4.375161033                         | 1.509661043                                         | hypothetical protein                                             |
| ABUW_RS02965 | 5.333078805                         | 0.991747211                                         | hypothetical protein                                             |
| ABUW_RS18870 | 6.084762391                         | 1.271610231                                         | hypothetical protein                                             |

<sup>1</sup> Values derived from Gebhardt, M. J. et al. 2015 [1]

**Table S3: Overview of the *A. baumannii* strains used in this study.**

| Strain                                        | Description                                                                       |        |                                   |      | Reference  |
|-----------------------------------------------|-----------------------------------------------------------------------------------|--------|-----------------------------------|------|------------|
|                                               | ST                                                                                | Origin | Source                            | Year |            |
| AB5075                                        | 1                                                                                 | USA    | osteomyelitis                     | 2008 | [2]        |
| AB5075 $\Delta ompR$                          | <i>ompR</i> deletion in the AB5075 strain                                         |        |                                   |      | this study |
| AB5075 <i>OmpR</i> complemented               | chromosomal insertion of <i>ompR</i> in the AB5075 $\Delta ompR$ strain           |        |                                   |      | this study |
| AB5075 <i>OmpR</i> D71A                       | chromosomal mutagenesis to introduce <i>OmpR</i> D71A in AB5075                   |        |                                   |      | this study |
| AB5075 <i>OmpR</i> D71E                       | chromosomal mutagenesis to introduce <i>OmpR</i> D71E in AB5075                   |        |                                   |      | this study |
| AB5075 <i>OmpR</i> R198L                      | chromosomal mutagenesis to introduce <i>OmpR</i> R198L in AB5075                  |        |                                   |      | this study |
| AYE                                           | 1                                                                                 | France | urinary tract sample              | 2001 | [3]        |
| AYE $\Delta ompR$                             | <i>ompR</i> deletion in the AYE strain                                            |        |                                   |      | this study |
| AYE $\Delta adeABC$                           | <i>adeABC</i> efflux pump deletion in the AYE strain                              |        |                                   |      | this study |
| AYE $\Delta adeABC\Delta adeIJK$              | <i>adeIJK</i> efflux pump deletion in the AYE $\Delta adeABC$ strain              |        |                                   |      | this study |
| AYE $\Delta adeABC\Delta adeIJK\Delta adeFGH$ | <i>adeFGH</i> efflux pump deletion in the AYE $\Delta adeABC\Delta adeIJK$ strain |        |                                   |      | this study |
| HUMC1                                         | 2                                                                                 | USA    | blood isolate                     | 2009 | [4]        |
| HUMC1 $\Delta ompR$                           | <i>ompR</i> deletion in the HUMC1 strain                                          |        |                                   |      | this study |
| LAC-4                                         | 10                                                                                | USA    | clinical outbreak                 | 1997 | [5]        |
| LAC-4 $\Delta ompR$                           | <i>ompR</i> deletion in the LAC-4 strain                                          |        |                                   |      | this study |
| ATCC-17978                                    | 77                                                                                | France | fatal meningitis                  | 1951 | [6]        |
| ATCC-17978 $\Delta ompR$                      | <i>ompR</i> deletion in the ATCC-17978 strain                                     |        |                                   |      | this study |
| BV191                                         | 2                                                                                 | China  | respiratory endotracheal aspirate | 2013 | [7]        |
| BV191 $\Delta ompR$                           | <i>ompR</i> deletion in the BV191 strain                                          |        |                                   |      | this study |

**Table S4: Primers used in this study.**

| Name                                    | Sequence                                                                       | Description                           |
|-----------------------------------------|--------------------------------------------------------------------------------|---------------------------------------|
| <b>Genetic engineering</b>              |                                                                                |                                       |
| <i>ompR</i> deletion                    |                                                                                |                                       |
| oVT170                                  | tgaggcctctcgaggaattcGCGGATGGCAGCTTCTAC                                         | <i>ompR</i> -up F                     |
| oVT171                                  | aacaacacgagctcGATGTACTCCCTTTTAAAGTCATAATTTATATATTATTG                          | <i>ompR</i> -up R                     |
| oVT172                                  | gagtacatcgagctcGTGTTTGTTCGGATGGTG                                              | <i>ompR</i> -down F                   |
| oVT173                                  | aggatccccgggtaccATTCGTTGGCAGCATTTTG                                            | <i>ompR</i> -down R                   |
| oVT179                                  | ACCTTTTCACGGCGCTCATA                                                           | <i>ompR</i> deletion verification F   |
| oVT180                                  | TCCCCTAGCATGATTCGTC                                                            | <i>ompR</i> deletion verification R   |
| <i>ompR</i> chromosomal complementation |                                                                                |                                       |
| oVT425                                  | caggggagaattgaggcctctcgagTATCGTCAAGCTCAGCGC                                    | <i>ponA</i> -up F                     |
| oVT426                                  | gtaccgagctcgaattcATCTCCAGAACGTCGTATGC                                          | <i>ponA</i> -up R                     |
| oVT427                                  | ggagatgcctgaattcagctcggtagccgggactagtgagctcctagagcctgcagCACCTCCAGCG<br>ATGAAAC | <i>rrm</i> -down F                    |
| oVT428                                  | ctatcaacagggagtccaagagtcgacctggTGTGGCGAGGGCTATTAC                              | <i>rrm</i> -down R                    |
| oVT630                                  | catacgacgttctggagatgaattcTCGTGTTGATCCCACAAG                                    | <i>ompR</i> complementation F         |
| oVT631                                  | tcacgtctggagtgctgcagGCAACGTAGTCGGTAAAGG                                        | <i>ompR</i> complementation R         |
| oVT430                                  | TGCTCTGAGACAACGACG                                                             | complementation verification F        |
| oVT431                                  | GTGTGAACAGGGCCATAGCT                                                           | complementation verification R        |
| <i>ompR</i> allelic exchange            |                                                                                |                                       |
| oVT634                                  | agaattgaggcctctcgaggaattcTGGGCCTTTAAGCTAGCC                                    | <i>ompR</i> -D71 F                    |
| oVT635                                  | tctagaggatccccgggtaccTTGCGGTGGTATTGGCTC                                        | <i>ompR</i> -D71 R                    |
| oVT636                                  | CTTATCGTGCTCGAGTTTATGTTGCCCG                                                   | <i>ompR</i> -D71E mutagenesis F       |
| oVT637                                  | CGGGCAACATAAACTCGAGCAGCATAAG                                                   | <i>ompR</i> -D71E mutagenesis R       |
| oVT638                                  | CTTATCGTGCTAGCCTTTATGTTGCCCG                                                   | <i>ompR</i> -D71A mutagenesis F       |
| oVT639                                  | CGGGCAACATAAAAGGCTAGCAGCATAAG                                                  | <i>ompR</i> -D71A mutagenesis R       |
| oVT642                                  | agaattgaggcctctcgaggaattcTACTGAGGGCTTGTGGC                                     | <i>ompR</i> -R198 F                   |
| oVT643                                  | tctagaggatccccgggtaccCAACCCAGCCTACCAGTAG                                       | <i>ompR</i> -R198 R                   |
| oVT644                                  | CGTGAACCTTTAACTCTAGACAAGCTCATGAAC                                              | <i>ompR</i> -R198L mutagenesis F      |
| oVT645                                  | GTTTCATGAGCTTGTCTAGAGTTAAAGGTTACG                                              | <i>ompR</i> -R198L mutagenesis R      |
| Efflux pump deletions                   |                                                                                |                                       |
| oCK558                                  | ggaatteGTCAGCGTCAGATTAAGCAAG                                                   | <i>adeABC</i> -up F                   |
| oCK559                                  | cccgggCCAAACCTAGTGAGTTTTTGATG                                                  | <i>adeABC</i> -up R                   |
| oCK560                                  | ACTCACTAGGTTTGGcccgggGCTGATAGAGGTATTCCAAATC                                    | <i>adeABC</i> -down F                 |
| oCK561                                  | gctctagaGCGTGAAGATTACCATTGCAGC                                                 | <i>adeABC</i> -down R                 |
| oCK564                                  | GGCCAGCTCATTACTATTCC                                                           | <i>adeABC</i> deletion verification F |
| oCK565                                  | GGCATCGTCGACAATAATCC                                                           | <i>adeABC</i> deletion verification R |
| oCK584                                  | aggcctgaattcGGCAAGTACACTTTCAACGG                                               | <i>adeIJK</i> -up F                   |
| oCK585                                  | cccgggGACATCATTGTTCCACCTCG                                                     | <i>adeIJK</i> -up R                   |
| oCK586                                  | CGAGGTGGAACAATGATGTCCCCGGGTGGTACATCAACCATCTAGTG                                | <i>adeIJK</i> -down F                 |
| oCK587                                  | cgggatccgggtaccGGCCTAACTGATCACTTGTG                                            | <i>adeIJK</i> -down R                 |
| oCK590                                  | CAACAGGTGCTAACGCACTC                                                           | <i>adeIJK</i> deletion verification F |
| oCK591                                  | AAAGTGCCGGTGTGAACGTC                                                           | <i>adeIJK</i> deletion verification R |
| oCK627                                  | agaattgaggcctctcgaggaattcAGCGGTTGCACACTGAAAG                                   | <i>adeFGH</i> -up F                   |
| oCK628                                  | ttgtcccgggGAGGTGCTCCTAGTTATTGG                                                 | <i>adeFGH</i> -up R                   |
| oCK629                                  | ggagcacctcccgggACAAATTATTTGCATATACAGGG                                         | <i>adeFGH</i> -down F                 |
| oCK630                                  | ccgcaagcttctgcaggtcctGACATCGCGGACAAAAGTTGG                                     | <i>adeFGH</i> -down R                 |
| oCK633                                  | GAAGATGTACAGCGCTTAGG                                                           | <i>adeFGH</i> deletion verification F |
| oCK635                                  | AGCTCCTTCATTGTGCTACG                                                           | <i>AdeFGH</i> deletion verification R |
| <b>qRT-PCR</b>                          |                                                                                |                                       |
| oVT572                                  | TGCGATGGCCGATTCAAATC                                                           | <i>ABUW_RS02965</i> F                 |
| oVT573                                  | TCATTGCGGTGGTCATAACG                                                           | <i>ABUW_RS02965</i> R                 |
| oVT683                                  | ATGGGTAGTTTGGCTGCTTG                                                           | <i>ABUW_RS02985</i> F                 |
| oVT684                                  | CACGGTGTTCATACGATGGTG                                                          | <i>ABUW_RS02985</i> R                 |
| oVT661                                  | TTATCAGCAGAAGACGGGAATAC                                                        | <i>ABUW_RS07785</i> F                 |
| oVT662                                  | CCCAACGCTCAGCATTAACTC                                                          | <i>ABUW_RS07785</i> R                 |
| oVT582                                  | TGATTCCGGCAGAGGTAATAGG                                                         | <i>ABUW_RS13110</i> F                 |
| oVT583                                  | ATAAAGCCCGCACTCATCAG                                                           | <i>ABUW_RS13110</i> R                 |
| oVT687                                  | TATGGCTGCTTTGGCTGAAC                                                           | <i>ABUW_RS01140</i> F                 |
| oVT688                                  | TCCGCTATTGACCAAATCGC                                                           | <i>ABUW_RS01140</i> R                 |
| oVT697                                  | ATCGCAACAACAGCAATGGC                                                           | <i>ABUW_RS18750</i> F                 |
| oVT698                                  | TGGATGCTGGTATTGATGCG                                                           | <i>ABUW_RS18750</i> R                 |

|                |                                                           |                                            |
|----------------|-----------------------------------------------------------|--------------------------------------------|
| oVT681         | TAGTGAGTGGGAACGCAAAC                                      | <i>ABUW_RS18865</i> F                      |
| oVT682         | TCACGACGATCCTTTTGCTG                                      | <i>ABUW_RS18865</i> R                      |
| oVT689         | ACAGCTGTTGGTTGTGCATC                                      | <i>ABUW_RS18870</i> F                      |
| oVT690         | ACACCAACACCAGCTTGTAC                                      | <i>ABUW_RS18870</i> R                      |
| oBV79          | GAGTCTAATGGCGGTGGT                                        | <i>rpoD</i> F                              |
| oBV80          | ATTGCTTCATCTGCTGGT                                        | <i>rpoD</i> R                              |
| <b>D-ELISA</b> |                                                           |                                            |
| oCK430         | CCCCTTTACTTTTGGTTACATATTC                                 | F1aF1b F<br>5' biotinylated                |
| oVT279         | GGGGAATATGTAACCAAAAGTAAAGGGG                              | F1aF1b R                                   |
| oVL147         | TTGAAAAATGCTAATGGTAGCACAGATACAGATTCTTCATATTTT             | <i>ABUW_RS02965 A</i> F<br>5' biotinylated |
| oVL148         | AAAAATATGAAGAATCTGTATCTGTGCTACCATTAGCATTTTTCAA            | <i>ABUW_RS02965 A</i> R                    |
| oVL149         | TTTTCTTTATAGTCATTACAAACAATATCAATCAAAGCCATTTT              | <i>ABUW_RS02965 B</i> F<br>5' biotinylated |
| oVL150         | AAAATGGCTTTGATTGATATTGTTTGTAATGACTATAAAGAAAA              | <i>ABUW_RS02965 B</i> R                    |
| oVL151         | TTTTATTCATGGTTTCTCCTTGACTCTCTTAATCTAGCTTCAGATCA<br>AGAT   | <i>ABUW_RS02965 C</i> F<br>5' biotinylated |
| oVL152         | ATCTTGATCTGAAGCTAGATTAAGAGAGAGTCAAGGAGAAACCATGA<br>ATAAAA | <i>ABUW_RS02965 C</i> R                    |
| -              | ATTTGTATTTAATATTTTAAACATAAA                               | SarA binding site F<br>5' biotinylated     |
| -              | TTTATGTTAAAATATTAATACAAAT                                 | SarA binding site R                        |

**Table S5. Crystallographic data-collection and refinement statistics**

|                                        |                    |
|----------------------------------------|--------------------|
| PDB entry                              | 6ZWT               |
| Beamline                               | SLS (PXIII)        |
| wavelength (Å)                         | 1.00003            |
| no. of images                          | 720                |
| exposure time (s)                      | 0.1                |
| oscillation range (deg)                | 0.5                |
| transmission (%)                       | 100                |
| Detector                               | PILATUS 2M         |
| space group                            | <i>P1</i>          |
| <i>a</i> , <i>b</i> , <i>c</i> (Å)     | 48.5, 49.7, 52.7   |
| $\alpha$ , $\beta$ , $\gamma$ (deg)    | 90.1, 99.0, 103.9  |
| resolution (Å)                         | 48.2–2.2 (2.3–2.2) |
| $R_{\text{merge}}$ (%)                 | 15.4 (85.3)        |
| $I/\sigma(I)$                          | 6.1 (1.5)          |
| completeness (%)                       | 98.1 (97.3)        |
| Redundancy                             | 3.6 (3.7)          |
| $CC_{1/2}$                             | 98.8 (73.5)        |
| resolution (Å)                         | 48.2–2.2           |
| no. of unique reflections              | 23437 (1999)       |
| $R_{\text{work}}$ , $R_{\text{free}}$  | 24.2, 27.3         |
| <b>no. of atoms</b>                    |                    |
| Protein                                | 3259               |
| other ligands                          | 34                 |
| Water                                  | 37                 |
| <b><i>B</i> factor (Å<sup>2</sup>)</b> |                    |
| Protein                                | 35.2               |
| other ligands                          | 47.5               |
| Water                                  | 25.1               |
| <b>root-mean-square deviation</b>      |                    |
| bond lengths (Å)                       | 0.009              |
| bond angles (deg)                      | 1.6                |
| <b>Ramachandran plot (%)</b>           |                    |
| residues in most favorable regions     | 94.6               |
| residues in additional allowed regions | 5.2                |



## References

1. Gebhardt MJ, Gallagher LA, Jacobson RK, Usacheva EA, Peterson LR, Zurawski DV, et al. Joint Transcriptional Control of Virulence and Resistance to Antibiotic and Environmental Stress in *Acinetobacter baumannii*. *mBio*. 2015;6: e01660-15. doi:10.1128/mBio.01660-15
2. Jacobs AC, Thompson MG, Black CC, Kessler JL, Clark LP, McQueary CN, et al. AB5075, a Highly Virulent Isolate of *Acinetobacter baumannii*, as a Model Strain for the Evaluation of Pathogenesis and Antimicrobial Treatments. *mBio*. 2014;5: e01076-14. doi:10.1128/mBio.01076-14
3. Fournier P-E, Vallenet D, Barbe V, Audic S, Ogata H, Poirel L, et al. Comparative genomics of multidrug resistance in *Acinetobacter baumannii*. *PLoS Genet*. 2006;2: e7. doi:10.1371/journal.pgen.0020007
4. Bruhn KW, Pantapalangkoor P, Nielsen T, Tan B, Junus J, Hujer KM, et al. Host fate is rapidly determined by innate effector-microbial interactions during *Acinetobacter baumannii* bacteremia. *J Infect Dis*. 2015;211: 1296–1305. doi:10.1093/infdis/jiu593
5. Valentine SC, Contreras D, Tan S, Real LJ, Chu S, Xu HH. Phenotypic and Molecular Characterization of *Acinetobacter baumannii* Clinical Isolates from Nosocomial Outbreaks in Los Angeles County, California. *J Clin Microbiol*. 2008;46: 2499–2507. doi:10.1128/JCM.00367-08
6. Piechaud M, Second L. [Studies of 26 strains of *Moraxella Iwoffii*]. *Ann Inst Pasteur*. 1951;80: 97–99.
7. Trebosc V, Gartenmann S, Royet K, Manfredi P, Tötzl M, Schellhorn B, et al. A Novel Genome-Editing Platform for Drug-Resistant *Acinetobacter baumannii* Reveals an AdeR-Unrelated Tigecycline Resistance Mechanism. *Antimicrob Agents Chemother*. 2016;60: 7263–7271. doi:10.1128/AAC.01275-16
